# Supplementary material for: Efficacy and tolerability of aripiprazole versus D2 antagonists in the early course of schizophrenia: a systematic review and meta-analysis
Source: PubMed Central journal article supplement (PMC8149726; doi:10.1038/s41537-021-00158-z), 2021-05-25
Supplement: 41537_2021_158_MOESM1_ESM.pdf [file 41537_2021_158_MOESM1_ESM.pdf]

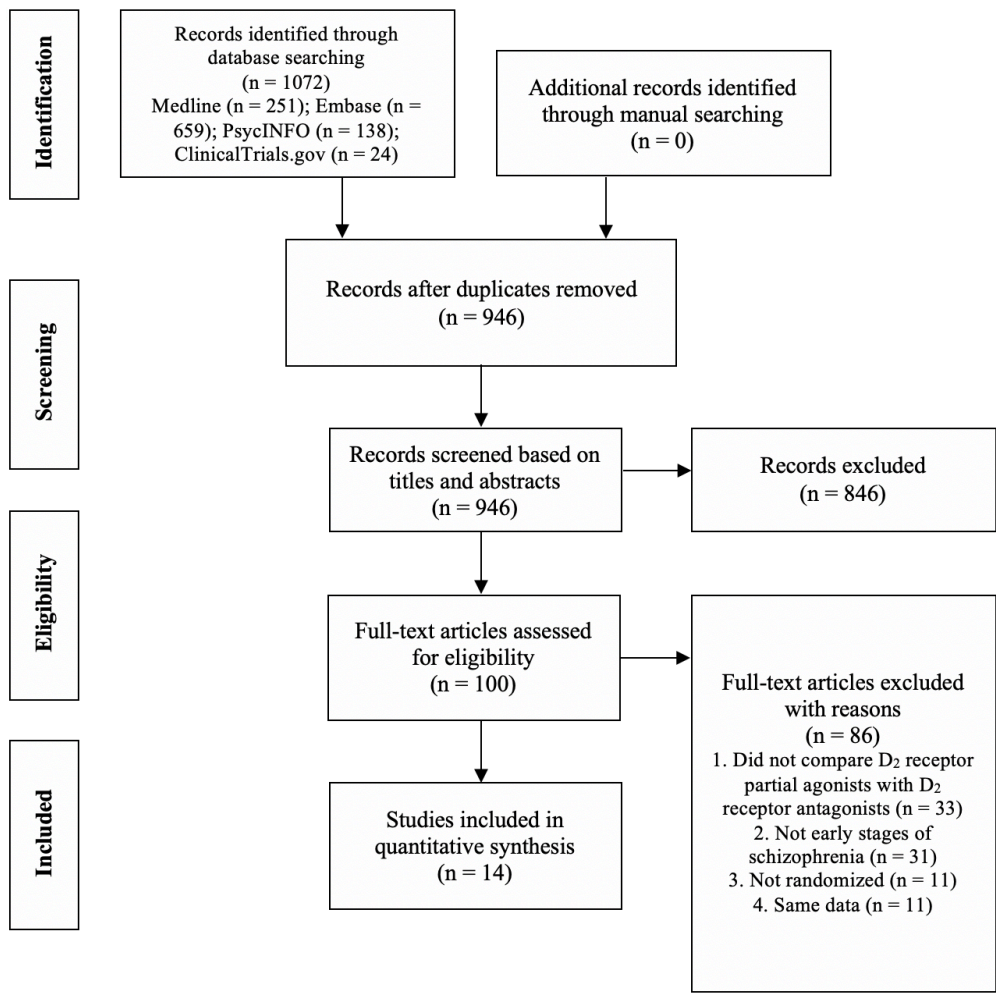

**Supplementary Figure 1.** PRISMA flow diagram of study selection.

a) Risk of bias graph

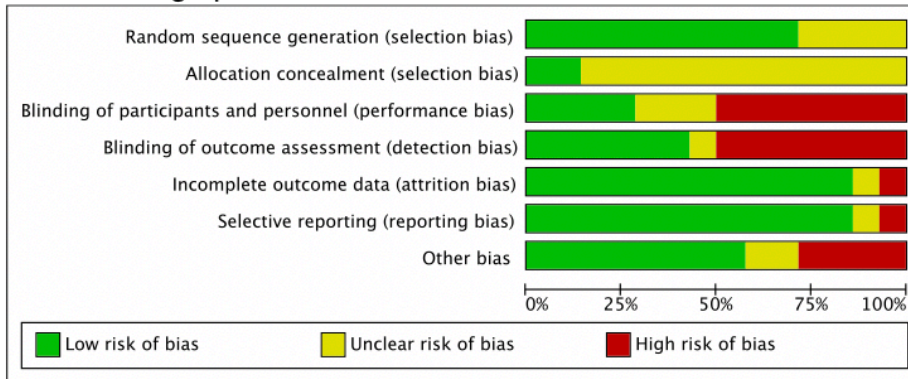

b) Risk of bias summary

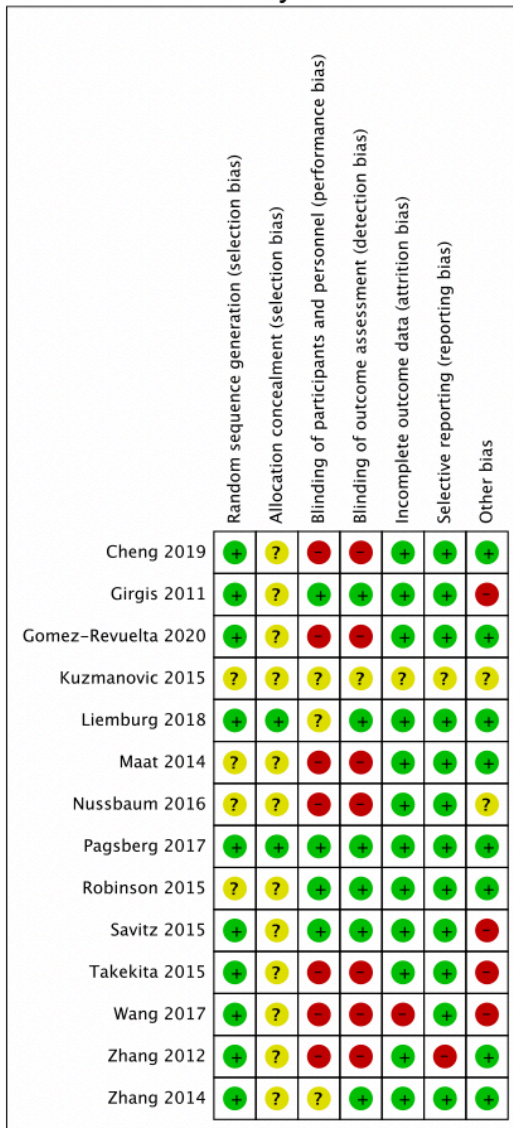

Supplementary Figure 2. Risk of bias assessment.

### a) Overall symptoms

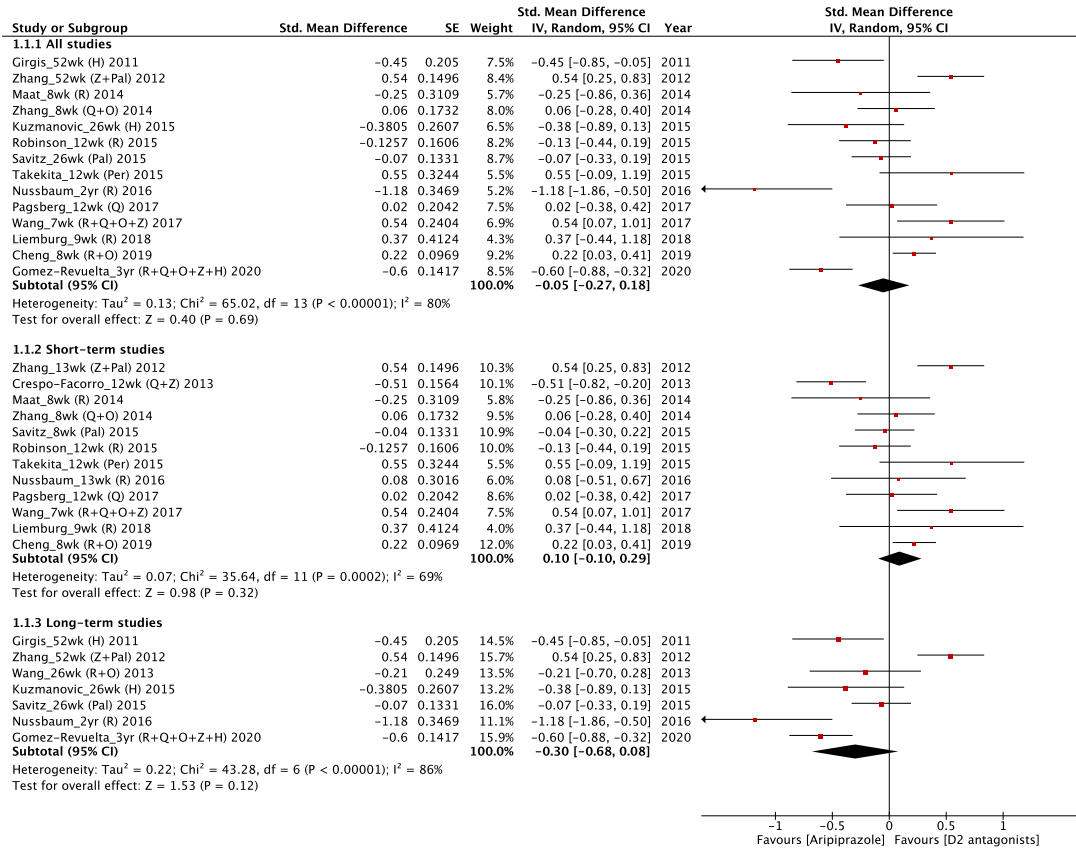

### b) All-cause discontinuation

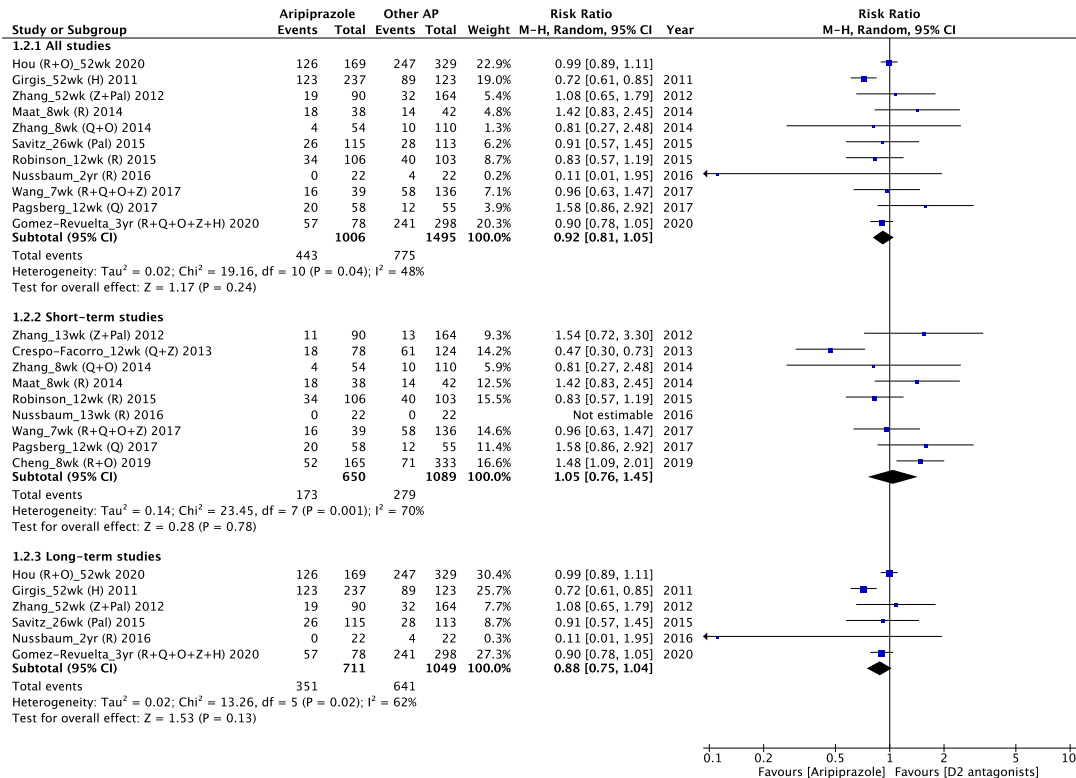

### c) Depressive symptoms

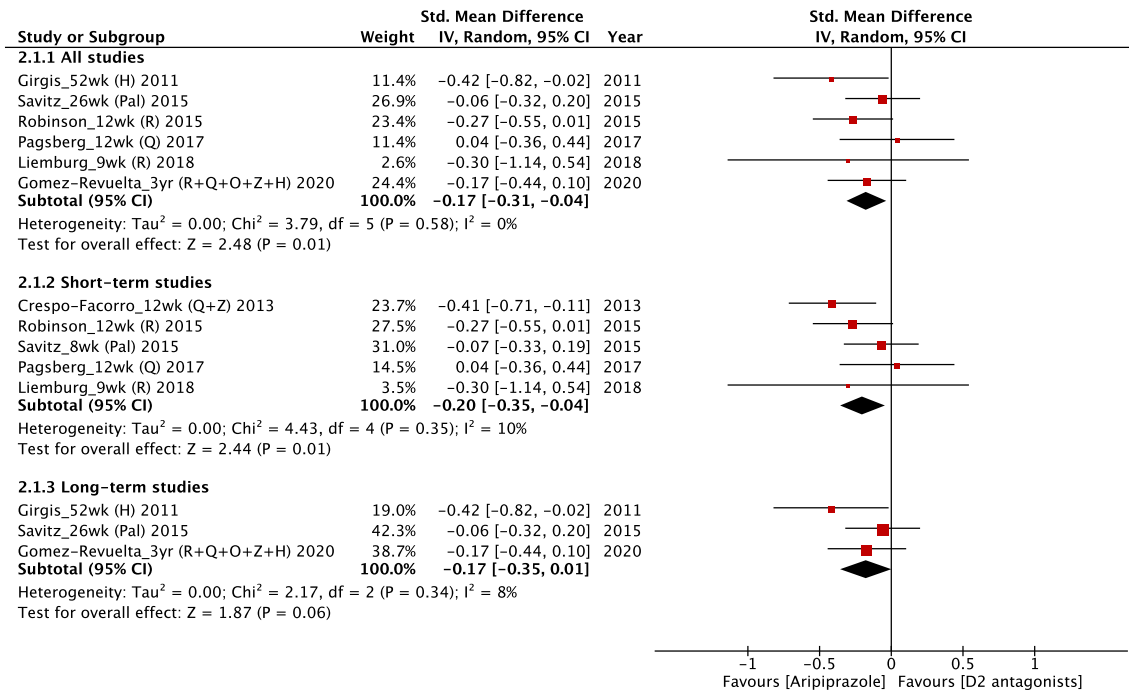

### d) Prolactin levels

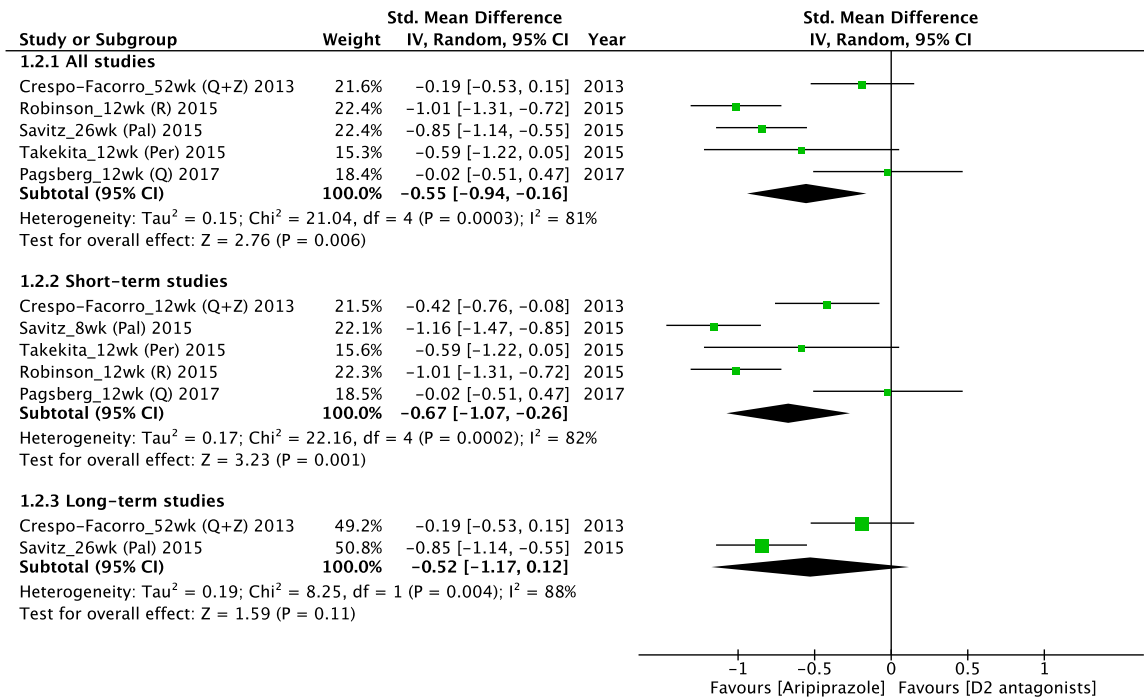

e) Triglyceride levels

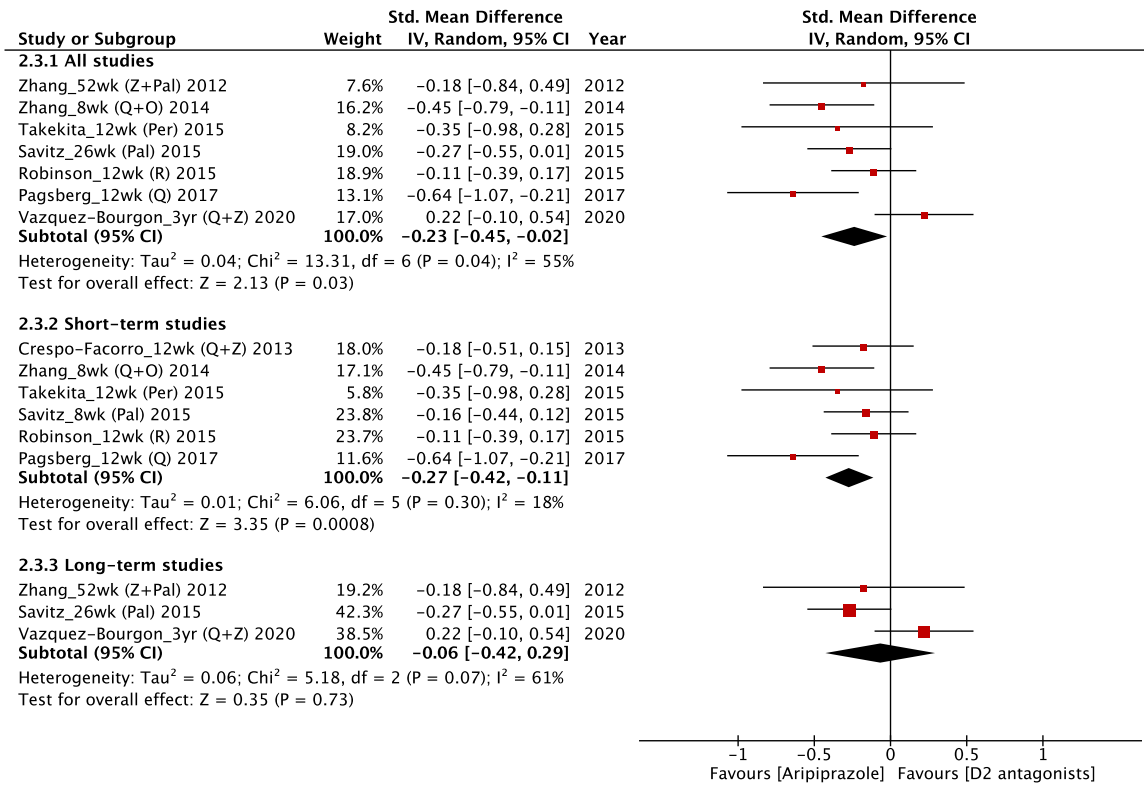

f) Total cholesterol levels

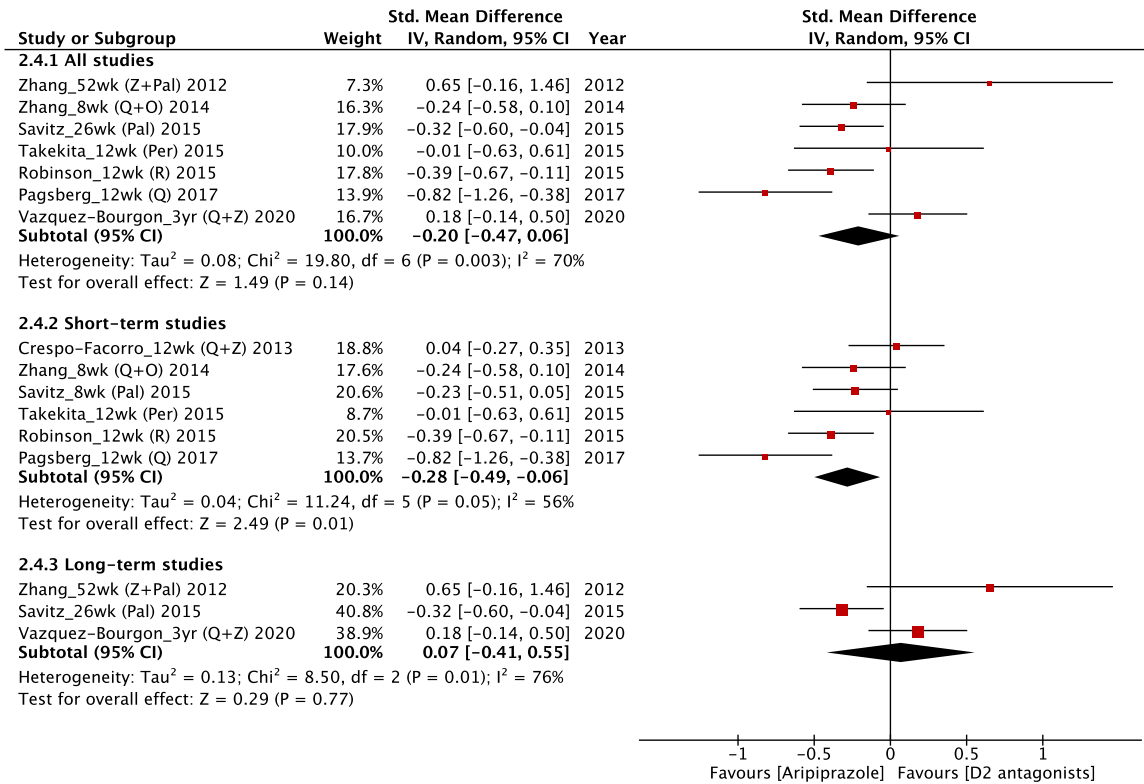

### g) Glucose levels

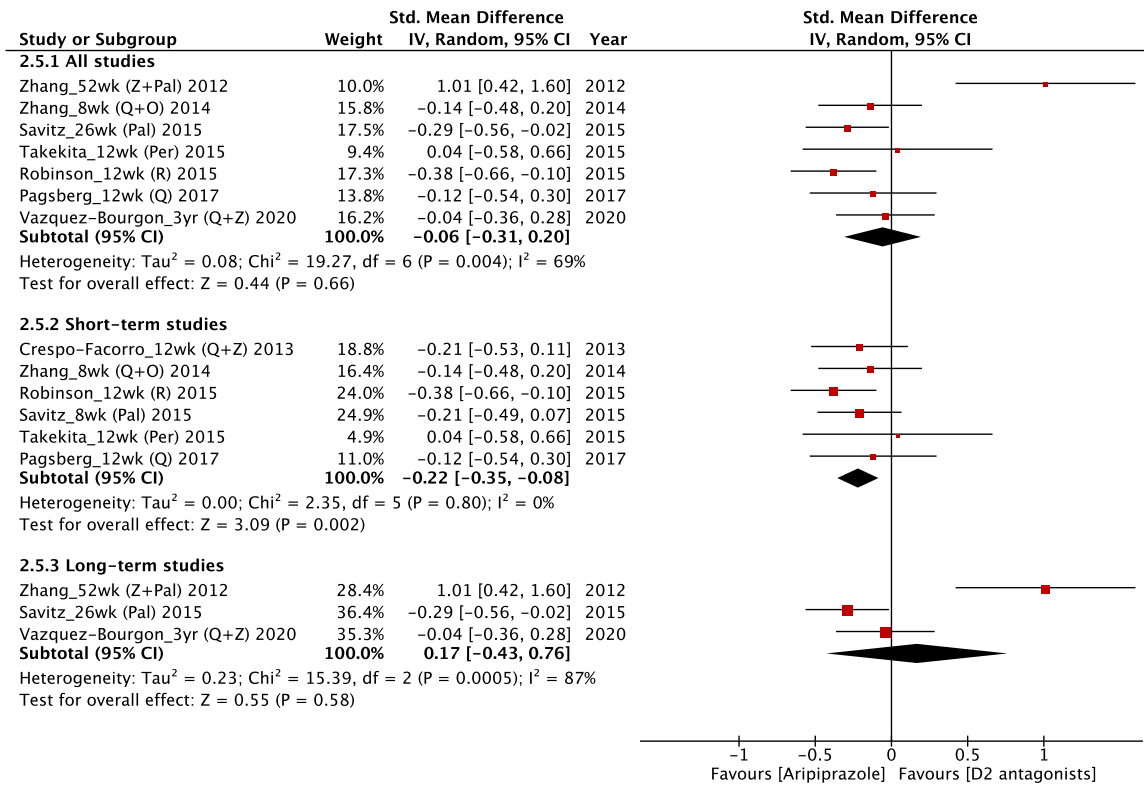

### h) Sedation

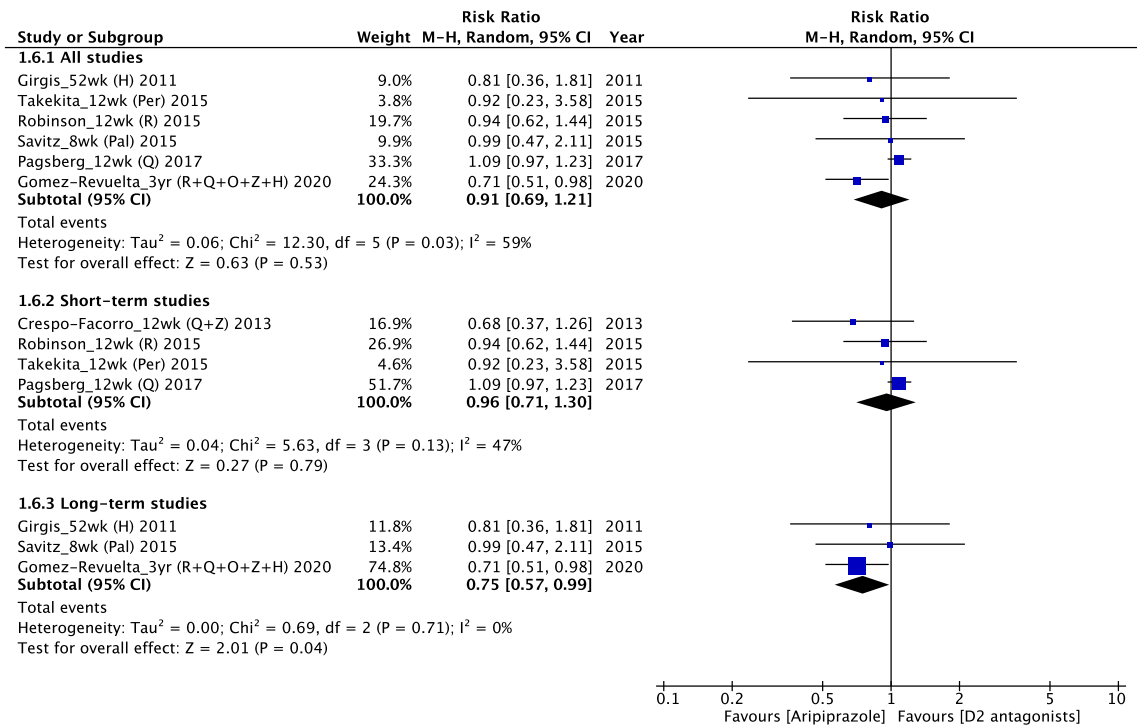

i) Anticholinergic use

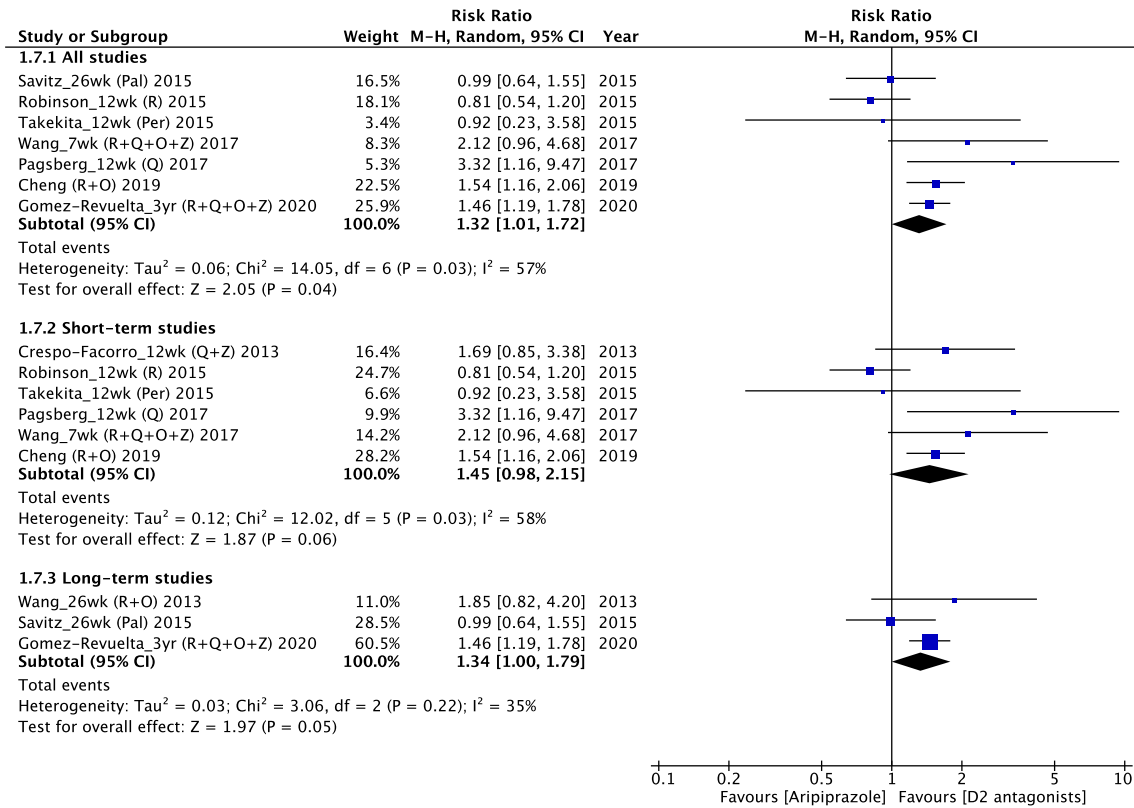

j) Akathisia

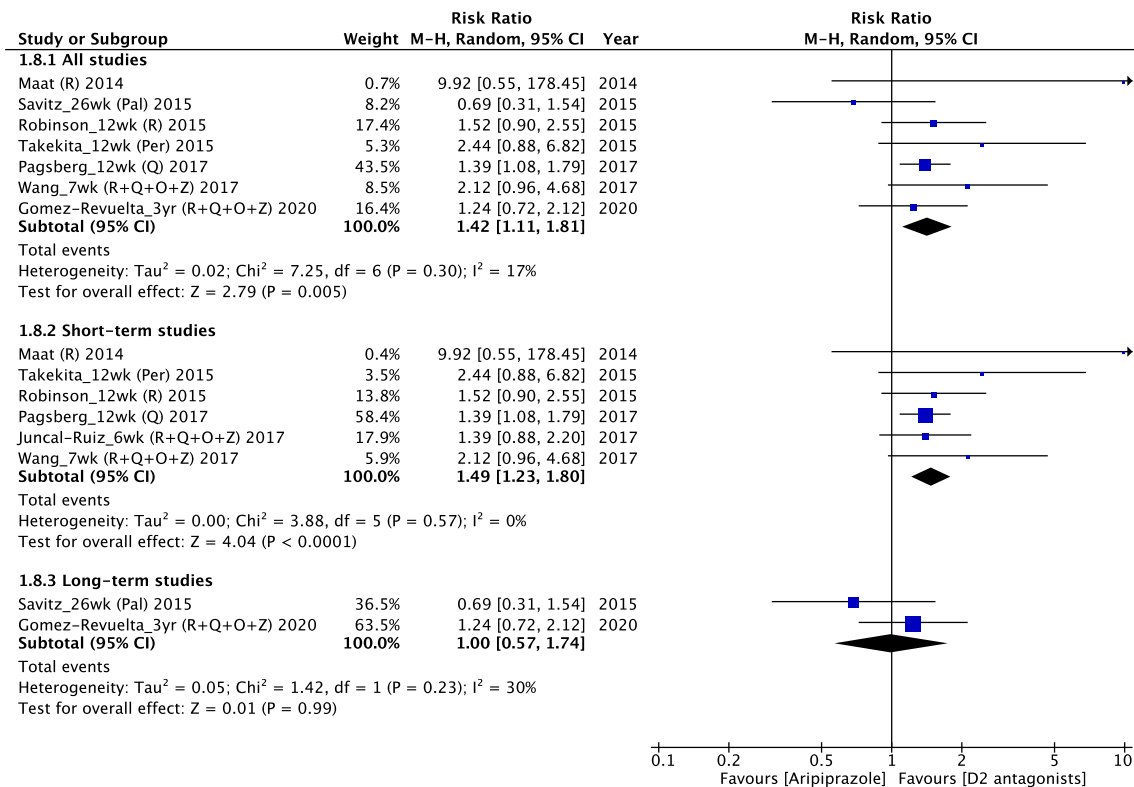

**Supplementary Figure 3.** Forest plots of comparisons of aripiprazole with D<sub>2</sub>R antagonists for main findings. H: haloperidol; O: olanzapine; Pal: paliperidone; Per: perospirone; Q: quetiapine; R: risperidone; Z: ziprasidone. For plots i) and j), haloperidol trials were removed for a more meaningful comparison of aripiprazole with second-generation D<sub>2</sub> antagonists.



**Supplementary Table 1.** Meta-regression analysis of the association of covariates with overall symptom reduction and all-cause discontinuation

|                                  | N  | Estimate | SE   | <i>t</i> | 95% CI         | <i>p</i>     |
|----------------------------------|----|----------|------|----------|----------------|--------------|
| <i>Overall symptom reduction</i> |    |          |      |          |                |              |
| Sample size                      | 14 | 0.00     | 0.00 | -0.42    | -0.01 to 0.00  | 0.679        |
| Percent open label               | 13 | -0.19    | 0.29 | -0.67    | -0.83 to 0.45  | 0.519        |
| Study year                       | 14 | -0.01    | 0.05 | -0.19    | -0.13 to 0.10  | 0.851        |
| Age                              | 13 | 0.02     | 0.02 | 1.21     | -0.02 to 0.06  | 0.250        |
| Percent male                     | 13 | 0.00     | 0.01 | -0.18    | -0.02 to 0.02  | 0.859        |
| Trial duration                   | 14 | -0.01    | 0.00 | -2.69    | -0.01 to -0.00 | <b>0.020</b> |
| Percent first episode            | 14 | 0.22     | 0.26 | 0.83     | -0.35 to 0.79  | 0.421        |
| Aripiprazole dose                | 13 | -0.01    | 0.02 | -0.53    | -0.06 to 0.04  | 0.609        |
| Baseline PANSS total             | 14 | -0.02    | 0.01 | -2.30    | -0.03 to -0.00 | <b>0.041</b> |
| Percent risperidone/olanzapine   | 14 | -0.16    | 0.30 | -0.55    | -0.81 to 0.49  | 0.594        |
| Blinding <sup>a</sup>            | 13 | -0.07    | 0.15 | -0.46    | -0.41 to 0.27  | 0.653        |
| <i>All-cause discontinuation</i> |    |          |      |          |                |              |
| Sample size                      | 11 | -0.00    | 0.00 | -0.78    | -0.01 to 0.00  | 0.435        |
| Percent open label               | 11 | -0.06    | 0.29 | -0.20    | -0.63 to 0.51  | 0.838        |
| Study year                       | 11 | 0.01     | 0.05 | 0.29     | -0.08 to 0.10  | 0.775        |
| Age                              | 11 | -0.01    | 0.02 | -0.34    | -0.06 to 0.04  | 0.736        |
| Percent male                     | 11 | -0.00    | 0.01 | -0.36    | -0.02 to 0.02  | 0.717        |
| Trial duration                   | 11 | -0.00    | 0.00 | -0.62    | -0.01 to 0.00  | 0.534        |
| Percent first episode            | 11 | 0.13     | 0.30 | 0.42     | -0.46 to 0.71  | 0.676        |
| Aripiprazole dose                | 10 | -0.02    | 0.01 | -1.46    | -0.05 to 0.01  | 0.146        |
| Baseline PANSS total             | 11 | -0.01    | 0.01 | -1.44    | -0.03 to 0.00  | 0.149        |
| Percent risperidone/olanzapine   | 11 | 0.01     | 0.30 | 0.03     | -0.58 to 0.60  | 0.974        |
| Blinding <sup>a</sup>            | 11 | -0.04    | 0.15 | -0.26    | -0.33 to 0.25  | 0.796        |

<sup>a</sup>Open-label, single-blind, and double-blind studies coded as 0, 1, and 2, respectively. D<sub>2</sub>R: dopamine D<sub>2</sub> receptor; PANSS: Positive and Negative Syndrome Scale.

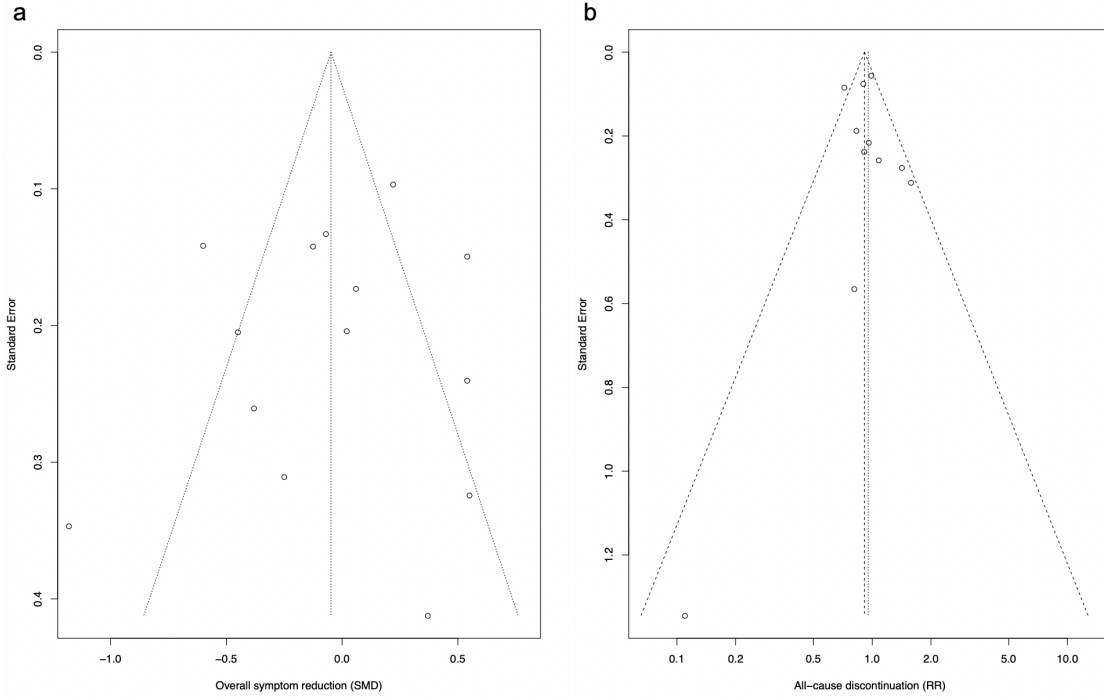

**Supplementary Figure 4.** Funnel plots of a) overall symptom reduction and b) all-cause discontinuation.
